# Supplementary material for: Highly structured pH-responsive honeycomb films by a combination of a breath figure process and in situ thermolysis of a polystyrene-block-poly(ethoxy ethyl acrylate) precursor
Source: Royal Society of Chemistry journal article supplement (doi:10.1039/c3py00643c), 2013-01-01
Supplement: c3py00643c.pdf [file c3py00643c.pdf]

Electronic Supplementary Information

**Highly structured pH-responsive honeycomb films by combination of  
breath figure process and *in situ* thermolysis of a polystyrene-*block*-  
poly(ethoxy ethyl acrylate) precursor**

Pierre Escalé,<sup>a,b</sup> Wim Van Camp,<sup>b</sup> Filip Du Prez,<sup>b</sup> Laurent Rubatat,<sup>a</sup> Laurent  
Billon,<sup>\*a</sup> and Maud Save<sup>\*a</sup>

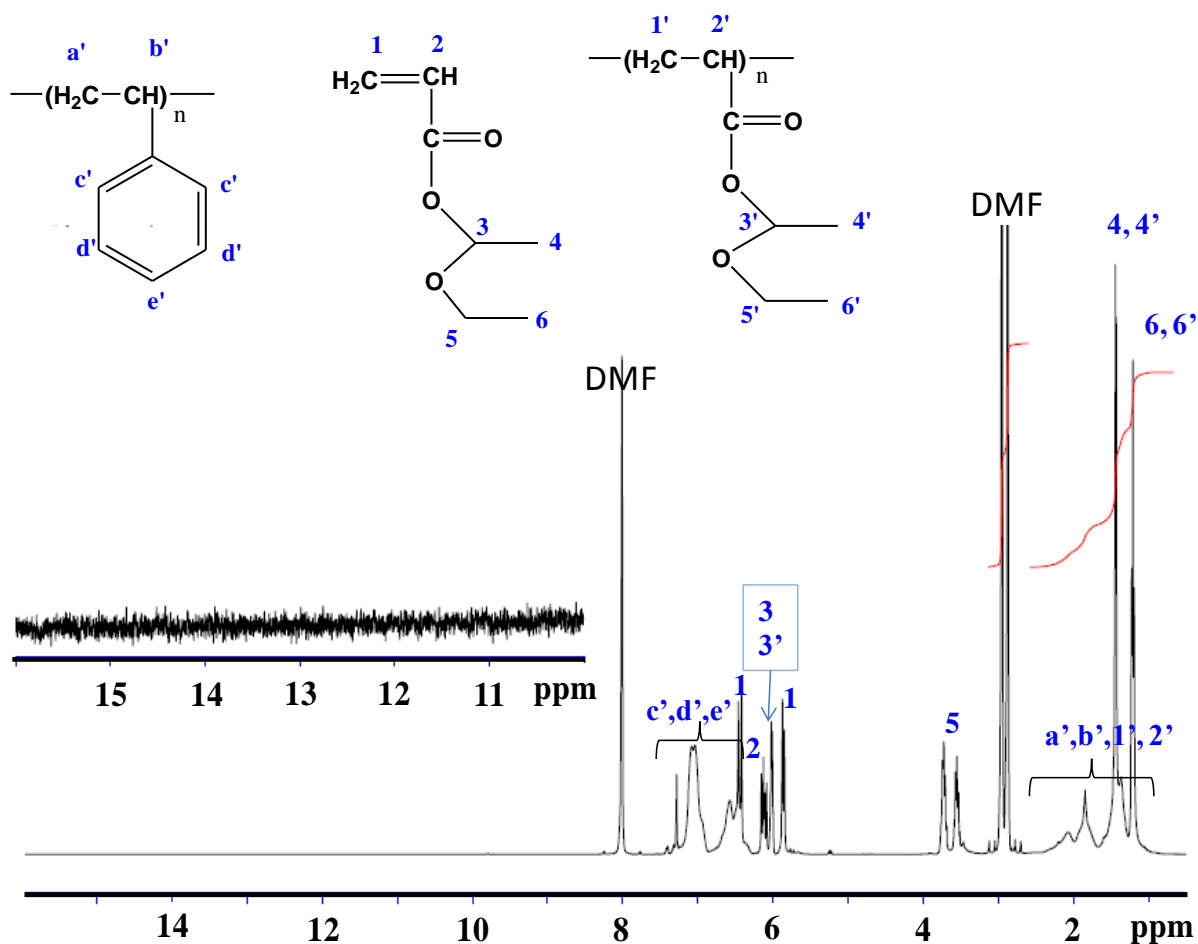

**Figure SI-1.** <sup>1</sup>H NMR spectrum of the crude BCP-2 sample recorded in CDCl<sub>3</sub>.

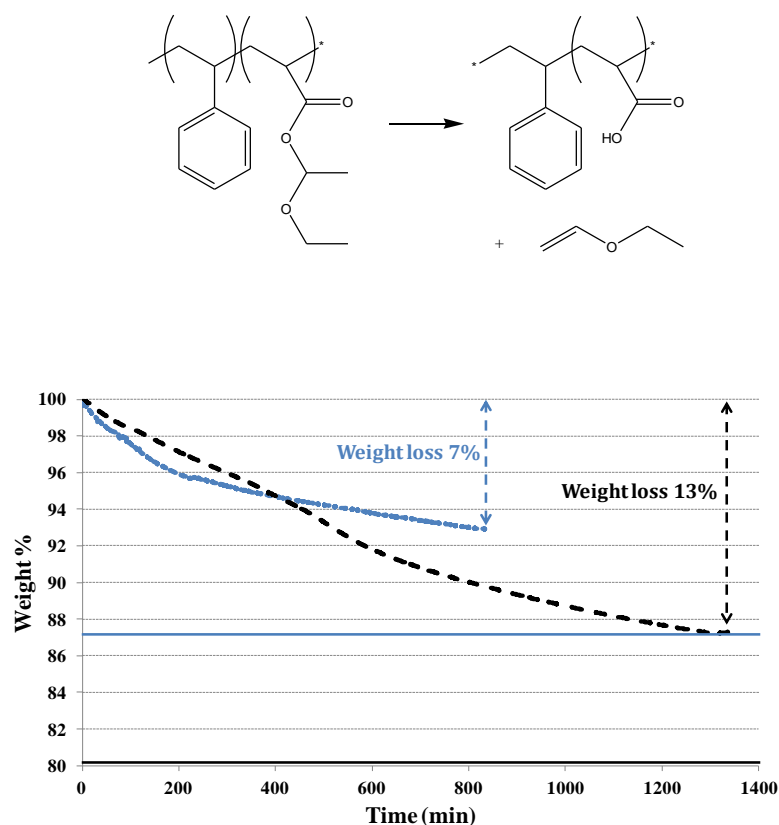

**Figure SI-2.** Weight loss of PS-*b*-PEEA honeycomb films (BCP-1 in blue, BCP-2 in dotted black) measured by TGA at 90 °C.

### Calculation of deprotection yield

Deprotection Yield =  $\frac{W\%_{TGA}}{W\%_{theo}}$  with  $W\%_{TGA}$  the experimental weight loss obtained by TGA and  $W\%_{theo}$  the theoretical weight loss calculated as follows:

$$W\%_{theo} = \frac{DP \times M_{ethyl\ vinyl\ ether}}{M_{n, copolymer}}$$

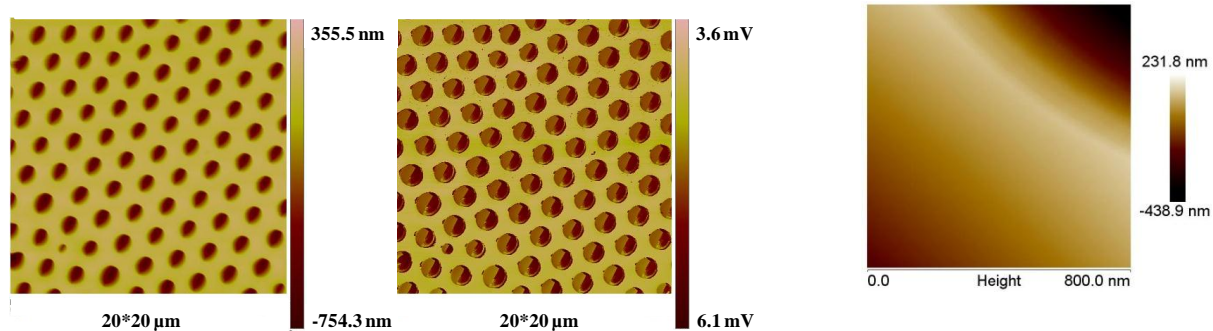

**Figure SI-3.** AFM topography (left) and phase (middle and right) images of honeycomb film made with PS-*b*-PEEA (BCP-2) copolymer.

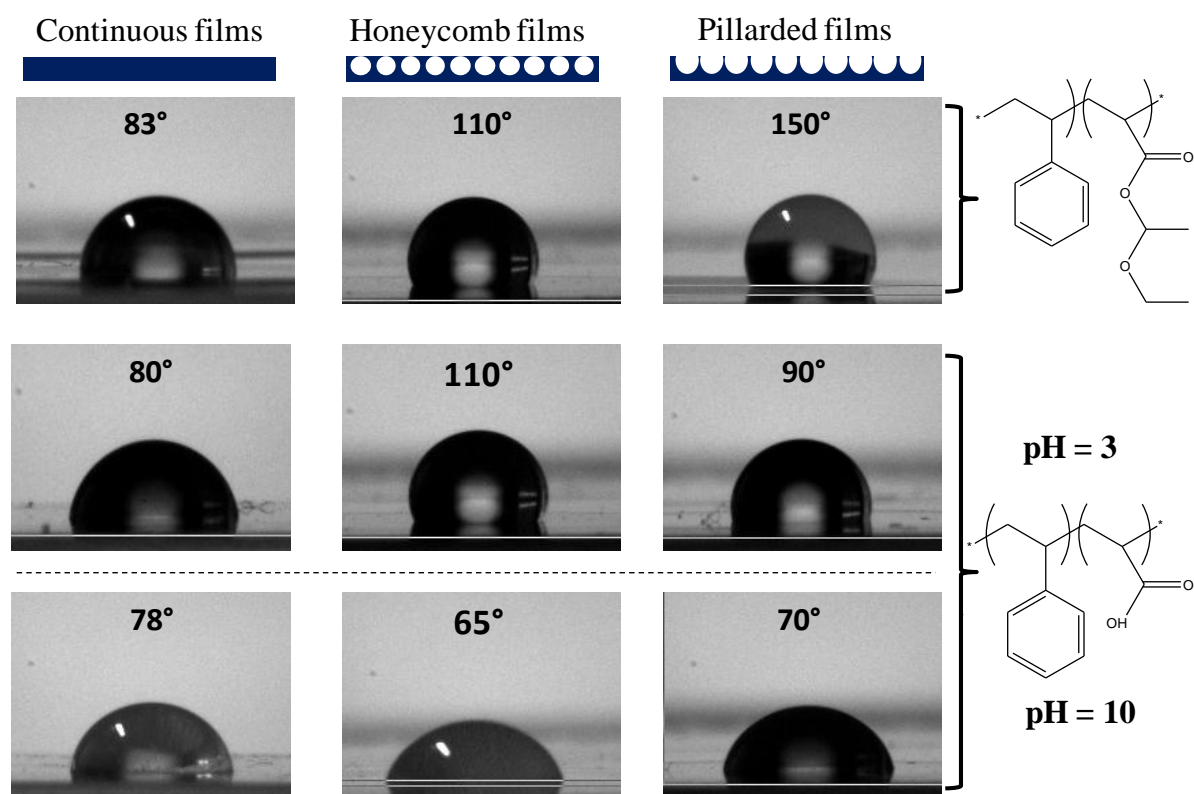

**Figure SI-4.** Water contact angle measurements on continuous, honeycomb and pillarded films made with PS-*b*-PEEA (BCP-2) copolymer.
